# Supplementary material for: MicroRNA-375 exacerbates knee osteoarthritis through repressing chondrocyte autophagy by targeting ATG2B
Source: publisher site journal article supplement (doi:10.18632/aging.103073), 2020-04-26
Supplement: Supplementary file [file aging-v12i8-103073-supplementary-material-SD1.pdf]

## SUPPLEMENTARY TABLES

**Supplementary Table 1. Clinical characteristics of osteoarthritis patients.**

| Samples   | Disease                    | Age (year) | Gender | Modified Mankin score |
|-----------|----------------------------|------------|--------|-----------------------|
| Patient_1 | osteoarthritis of the knee | 63         | male   | 20                    |
| Patient_2 | osteoarthritis of the knee | 65         | male   | 17                    |
| Patient_3 | osteoarthritis of the knee | 70         | female | 18                    |
| Patient_4 | osteoarthritis of the knee | 72         | female | 20                    |
| Patient_5 | osteoarthritis of the knee | 66         | male   | 18                    |
| Patient_6 | osteoarthritis of the knee | 65         | male   | 19                    |
| Patient_7 | osteoarthritis of the knee | 69         | female | 17                    |
| Patient_8 | osteoarthritis of the knee | 71         | male   | 19                    |

**Supplementary Table 2. Oligonucleotide sequences and RT-qPCR primers.**

| <b>Oligonucleotide sequences and RT-qPCR primers for human specimens</b> |                                                                                                                |
|--------------------------------------------------------------------------|----------------------------------------------------------------------------------------------------------------|
| miR-375-3p                                                               | UUUGUUCGUUCGGCUCGCGUGA                                                                                         |
| U6                                                                       | GTGCTCGCTTCGGCAGCACATATACTAAAATTGGAACGATACAGAGAAGATTAGC<br>ATGGCCCCTGCGCAAGGATGACACGCAAATTCGTGAAGCGTTCCATATTTT |
| Atg2b                                                                    | Forward: 5'-AACTGCTGACGAATCCTCAGG-3'<br>Reverse: 5'-GGGGTCCAGCTAGGTGAGA-3'                                     |
| $\beta$ -actin                                                           | Forward: 5'-GTAACCCGTTGAACCCCAT-3'<br>Reverse: 5'-CCATCCAATCGGTAGTAGCG-3'                                      |
| <b>Oligonucleotide sequences and RT-qPCR primers for mouse specimens</b> |                                                                                                                |
| miR-375-3p                                                               | UUUGUUCGUUCGGCUCGCGUGA                                                                                         |
| U6                                                                       | GTGCTCGCTTCGGCAGCACATATACTAAAATTGGAACGATACAGAGAAGATTAGC<br>ATGGCCCCTGCGCAAGGATGACACGCAAATTCGTGAAGCGTTCCATATTTT |
| Atg2b                                                                    | Forward: 5'-TGCCAGAGGTGTTTGTGGT-3'<br>Reverse: 5'-TTGGCCAAGGGAAGTGGTTT-3'                                      |
| $\beta$ -actin                                                           | Forward: 5'-GTAACCCGTTGAACCCCAT-3'<br>Reverse: 5'-CCATCCAATCGGTAGTAGCG-3'                                      |
